# Supplementary material for: Efficient Artificial Fertilization and Ovulated Egg Preservation in Kawakawa Euthynnus affinis
Source: MDPI journal article supplement (doi:10.3390/jmse10050599), 2022-04-28
Supplement: s1 [file s1]

Archive with 1 entries (1 files):
- jmse-1662690-supplementary.pdf
