# Supplementary material for: Efficient Artificial Fertilization and Ovulated Egg Preservation in Kawakawa Euthynnus affinis
Source: MDPI journal article supplement (doi:10.3390/jmse10050599), 2022-04-28
Supplement: s1 [file s1 › jmse-1662690-supplementary.pdf]

Table S1. Fish information of all females for the series of artificial fertilization

| Trial | Date             | Age | Fork length<br>(cm) | Body weight<br>(g) | Ovulation | Gonadal weight<br>(g) | Ovulated eggs weight<br>(g) | Female No. |
|-------|------------------|-----|---------------------|--------------------|-----------|-----------------------|-----------------------------|------------|
| 1     | 4 August 2021    | 2+  | 53.0                | 2,213              | Yes       | 172.39                | 91.75                       | Female 1   |
|       |                  | 2+  | 51.8                | 2,715              | Yes       | 285.74                | 169.38                      | Female 2   |
|       |                  | 2+  | 49.7                | 2,117              | Yes       | 110.59                | 33.55*                      | –          |
| 2     | 6 August 2021    | 2+  | 51.9                | 2,923              | Yes       | 369.20                | 175.10                      | Female 3   |
|       |                  | 2+  | 54.9                | 3,164              | Yes       | 210.92                | 94.77                       | Female 4   |
|       |                  | 2+  | 53.1                | 2,522              | Yes       | 130.44                | No data                     | Female 5   |
| 3     | 11 August 2021   | 2+  | 56.5                | 3,546              | No        | 153.09                | 0.00                        | –          |
|       |                  | 2+  | 47.8                | 1,798              | No        | 44.64                 | 0.00                        | –          |
| 4     | 16 August 2021   | 2+  | 54.5                | 2,915              | No        | 111.45                | 0.00                        | –          |
|       |                  | 2+  | 57.2                | 3,248              | No        | 98.13                 | 0.00                        | –          |
|       |                  | 2+  | 55.6                | 2,828              | No        | 146.09                | 0.00                        | –          |
| 5     | 23 August 2021   | 2+  | 55.7                | 2,934              | Yes       | 140.42                | 88.00                       | Female 6   |
|       |                  | 2+  | 52.8                | 2,500              | No        | 113.79                | 0.00                        | –          |
|       |                  | 2+  | 55.2                | 3,016              | No        | 127.20                | 0.00                        | –          |
| 6     | 25 August 2021   | 2+  | 54.8                | 2,953              | No        | 1.26                  | 0.00                        | –          |
|       |                  | 2+  | 54.3                | 2,829              | No        | 73.37                 | 0.00                        | –          |
| 7     | 2 September 2021 | 2+  | No data             | 3,048              | Yes       | 250.73                | 146.69                      | Female 7   |
|       |                  | 2+  | 50.5                | 2,614              | Yes       | 166.37                | 82.66                       | Female 8   |
| 8     | 7 September 2021 | 2+  | 52.8                | 2,689              | Yes       | 276.80                | 193.00                      | Female 9   |

|    |                   |    |         |       |     |        |        |           |
|----|-------------------|----|---------|-------|-----|--------|--------|-----------|
|    |                   | 2+ | 56.4    | 2,702 | Yes | 201.98 | 101.21 | Female 10 |
| 9  | 10 September 2021 | 2+ | 55.2    | 3,127 | Yes | 213.33 | 123.52 | Female 11 |
|    |                   | 4+ | 59.3    | 3,248 | No  | 102.61 | 0.00   | —         |
| 10 | 14 September 2021 | 2+ | No data | 2,532 | Yes | 200.20 | 124.50 | Female 12 |
|    |                   | 2+ | No data | 3,159 | No  | 103.47 | 0.00   | —         |

\*Artificial fertilization could not be performed because the number of ovulated eggs from this female was low.

Table S2. Fish information of males used for artificial fertilization

| Date              | Males No. | Age | Fork length (cm) | Body weight (g) | Gonadal weight (g) | Inseminated females No. |
|-------------------|-----------|-----|------------------|-----------------|--------------------|-------------------------|
| 4 August 2021     | 1         | 2+  | 55.3             | 2,816           | 144.43             | Female 1 and 2          |
|                   | 2         | 2+  | 50.6             | 2,147           | 128.05             |                         |
| 6 August 2021     | 3         | 2+  | 53.4             | 2,800           | 177.60             | Female 3, 4, and 5      |
|                   | 4         | 2+  | 54.3             | 2,982           | 165.37             |                         |
| 23 August 2021    | 5         | 2+  | 55.7             | 3,225           | 298.99             | Female 6                |
|                   | 6         | 2+  | 56.5             | 3,233           | 249.01             |                         |
| 2 September 2021  | 7         | 3+  | 54.6             | 3,316           | 277.58             | Female 7 and 8          |
|                   | 8         | 2+  | 51.1             | 2,777           | 168.54             |                         |
|                   | 9         | 2+  | 52.1             | 2,717           | 164.37             |                         |
| 7 September 2021  | 10        | 2+  | 54.3             | 2,455           | 137.86             | Female 9 and 10         |
|                   | 11        | 2+  | No data          | 2,889           | 142.35             |                         |
| 10 September 2021 | 12        | 2+  | 54.5             | 2,885           | 107.42             | Female 11               |
|                   | 13        | 2+  | 56.0             | 3,261           | 133.53             |                         |
| 14 September 2021 | 14        | 3+  | 56.9             | 3,846           | 290.39             | Female 12               |
|                   | 15        | 2+  | 55.2             | 2,962           | 153.58             |                         |

Table S3. Precipitation and daylight hours of the Misho area [33] from 3 August 2021 to 15 September 2021.

| Date                     | 3 Aug   | 4       | 5       | 6       | 7           | 8            | 9           | 10    | 11          | 12          | 13          |
|--------------------------|---------|---------|---------|---------|-------------|--------------|-------------|-------|-------------|-------------|-------------|
| Precipitation (mm)       | 0.0     | 0.0     | 0.0     | 8.0     | 0.0         | <b>61.5</b>  | 16.0        | 0.0   | <b>45.5</b> | <b>63.5</b> | <b>69.0</b> |
| Daylight hours (h)       | 11.7    | 8.5     | 11.4    | 4.5     | 8.2         | 5.2          | 1.8         | 7.5   | 0.0         | 0.0         | 0.0         |
| Artificial fertilization | –       | Trial 1 | –       | Trial 2 | –           | –            | –           | –     | Trial 3     | –           | –           |
| Ovulation rate (%)       | –       | 100.0   | –       | 100.0   | –           | –            | –           | –     | 0.0         | –           | –           |
| Date                     | 14 Aug  | 15      | 16      | 17      | 18          | 19           | 20          | 21    | 22          | 23          | 24          |
| Precipitation (mm)       | 15.5    | 25.0    | 16.0    | 24.5    | <b>51.5</b> | <b>100.0</b> | <b>55.5</b> | 1.0   | 0.0         | 0.0         | 0.0         |
| Daylight hours (h)       | 0.0     | 0.0     | 0.0     | 0.0     | 0.0         | 0.0          | 1.0         | 0.2   | 1.5         | 4.9         | 0.0         |
| Artificial fertilization | –       | –       | Trial 4 | –       | –           | –            | –           | –     | –           | Trial 5     | –           |
| Ovulation rate (%)       | –       | –       | 0.0     | –       | –           | –            | –           | –     | –           | 33.3        | –           |
| Date                     | 25 Aug  | 26      | 27      | 28      | 29          | 30           | 31          | Sep 1 | 2           | 3           | 4           |
| Precipitation (mm)       | 0.0     | 0.0     | 0.0     | 0.0     | 0.0         | 0.0          | 0.0         | 0.0   | 0.0         | 0.0         | 0.0         |
| Daylight hours (h)       | 3.0     | 8.1     | 11.5    | 12.3    | 12.3        | 12.3         | 12.1        | 3.4   | 1.4         | 1.4         | 9.5         |
| Artificial fertilization | Trial 6 | –       | –       | –       | –           | –            | –           | –     | Trial 7     | –           | –           |
| Ovulation rate (%)       | 0.0     | –       | –       | –       | –           | –            | –           | –     | 100.0       | –           | –           |
| Date                     | 5 Sep   | 6       | 7       | 8       | 9           | 10           | 11          | 12    | 13          | 14          | 15          |
| Precipitation (mm)       | 0.0     | 0.0     | 0.0     | 0.0     | 0.0         | 0.0          | 0.0         | 3.0   | 0.5         | 13.0        | 4.0         |
| Daylight hours (h)       | 3.4     | 4.6     | 0.6     | 7.6     | 10.7        | 9.0          | 5.6         | 0.1   | 0.0         | 0.0         | 0.0         |
| Artificial fertilization | –       | –       | Trial 8 | –       | –           | Trial 9      | –           | –     | –           | Trial 10    | –           |
| Ovulation rate (%)       | –       | –       | 100.0   | –       | –           | 50.0         | –           | –     | –           | 33.3        | –           |

Table S4. Developmental efficiency after preservation of ovulated eggs in different solution.

|                   | Preservation solution | Preservation time |                |                |                              |                |
|-------------------|-----------------------|-------------------|----------------|----------------|------------------------------|----------------|
|                   |                       | 0 h (Initial)     | 1 h            | 3 h            | 5 h                          | 12 h           |
| Fertilization (%) | Control               | 99.1 $\pm$ 0.3    | 98.9 $\pm$ 0.3 | 89.2 $\pm$ 3.4 | 81.6 $\pm$ 4.9 <sup>a</sup>  | 64.1 $\pm$ 4.8 |
|                   | Hanks'                | 99.2 $\pm$ 0.2    | 99.1 $\pm$ 0.2 | 95.8 $\pm$ 1.4 | 72.5 $\pm$ 9.8 <sup>ab</sup> | 54.9 $\pm$ 9.5 |
|                   | L-15                  | 98.5 $\pm$ 0.7    | 98.5 $\pm$ 0.3 | 82.0 $\pm$ 4.8 | 60.6 $\pm$ 6.3 <sup>b</sup>  | 36.5 $\pm$ 8.2 |
|                   | Ringer's              | 98.6 $\pm$ 0.7    | 98.7 $\pm$ 0.3 | 96.3 $\pm$ 0.9 | 80.1 $\pm$ 5.8 <sup>ab</sup> | 45.1 $\pm$ 6.0 |
| Hatching (%)      | Control               | 93.8 $\pm$ 2.3    | 93.0 $\pm$ 1.2 | 81.9 $\pm$ 5.4 | 75.8 $\pm$ 3.7 <sup>a</sup>  | 20.2 $\pm$ 5.7 |
|                   | Hanks'                | 93.5 $\pm$ 2.6    | 90.6 $\pm$ 1.8 | 82.2 $\pm$ 7.3 | 41.5 $\pm$ 8.6 <sup>b</sup>  | 5.9 $\pm$ 3.3  |
|                   | L-15                  | 91.2 $\pm$ 3.6    | 91.4 $\pm$ 4.0 | 73.2 $\pm$ 9.0 | 33.7 $\pm$ 9.6 <sup>b</sup>  | 9.4 $\pm$ 2.5  |
|                   | Ringer's              | 94.8 $\pm$ 1.4    | 90.6 $\pm$ 2.2 | 84.1 $\pm$ 3.8 | 51.6 $\pm$ 6.9 <sup>ab</sup> | 7.5 $\pm$ 3.1  |
| Normal larvae (%) | Control               | 91.2 $\pm$ 3.3    | 90.5 $\pm$ 1.3 | 78.5 $\pm$ 5.3 | 69.8 $\pm$ 3.4 <sup>a</sup>  | 12.1 $\pm$ 3.4 |
|                   | Hanks'                | 92.3 $\pm$ 2.7    | 89.4 $\pm$ 1.8 | 75.9 $\pm$ 7.2 | 33.9 $\pm$ 7.9 <sup>b</sup>  | 4.6 $\pm$ 2.8  |
|                   | L-15                  | 89.2 $\pm$ 3.9    | 89.8 $\pm$ 3.9 | 68.0 $\pm$ 9.5 | 29.6 $\pm$ 8.3 <sup>b</sup>  | 4.9 $\pm$ 1.4  |
|                   | Ringer's              | 93.3 $\pm$ 1.6    | 87.6 $\pm$ 2.4 | 78.9 $\pm$ 4.0 | 43.1 $\pm$ 5.1 <sup>b</sup>  | 3.5 $\pm$ 1.5  |

Each value is the mean  $\pm$  SE of the twelve replicates using ovulated eggs from six females.

Different superscript letters in the column of 5 h preservation indicate significant differences as determined by the Steel–Dwass test ( $p < 0.05$ ).

There is a significant difference between “a” and “b”. There is no significant difference between “a” and “ab” or “b” and “ab”.

Table S5. Developmental capacity after preservation of ovulated eggs in different temperatures.

|                   |                          | Control           |            |            |             | Hanks' solution   |            |            |            |
|-------------------|--------------------------|-------------------|------------|------------|-------------|-------------------|------------|------------|------------|
|                   | Preservation temperature | Preservation time |            |            |             | Preservation time |            |            |            |
|                   |                          | 0 h<br>(Initial)  | 1 h        | 3 h        | 5 h         | 0 h<br>(Initial)  | 1 h        | 3 h        | 5 h        |
| Fertilization (%) | 15°C                     |                   | 87.5 ± 4.1 | 83.5 ± 5.3 | 53.3 ± 10.3 |                   | 84.5 ± 7.0 | 88.6 ± 5.0 | 83.3 ± 6.3 |
|                   | 20°C                     | 88.5 ± 4.6        | 92.1 ± 2.3 | 87.6 ± 4.4 | 72.4 ± 9.1  | 91.8 ± 2.7        | 90.6 ± 4.6 | 93.9 ± 2.0 | 78.1 ± 8.1 |
|                   | 25°C                     |                   | 83.8 ± 6.3 | 76.0 ± 6.1 | 63.0 ± 9.5  |                   | 74.8 ± 8.5 | 70.2 ± 7.1 | 45.8 ± 7.6 |
| Hatching (%)      | 15°C                     |                   | 71.6 ± 5.6 | 54.3 ± 7.6 | 41.5 ± 5.9  |                   | 67.0 ± 9.6 | 61.1 ± 4.4 | 42.2 ± 5.6 |
|                   | 20°C                     | 66.4 ± 7.3        | 71.7 ± 7.7 | 66.3 ± 6.9 | 58.2 ± 6.0  | 76.8 ± 5.8        | 75.7 ± 8.9 | 75.6 ± 5.1 | 52.6 ± 6.5 |
|                   | 25°C                     |                   | 57.6 ± 9.9 | 55.6 ± 8.1 | 35.4 ± 7.6  |                   | 62.8 ± 9.6 | 37.5 ± 9.6 | 10.8 ± 3.9 |

Each value is the mean ± SE of the eleven replicates.

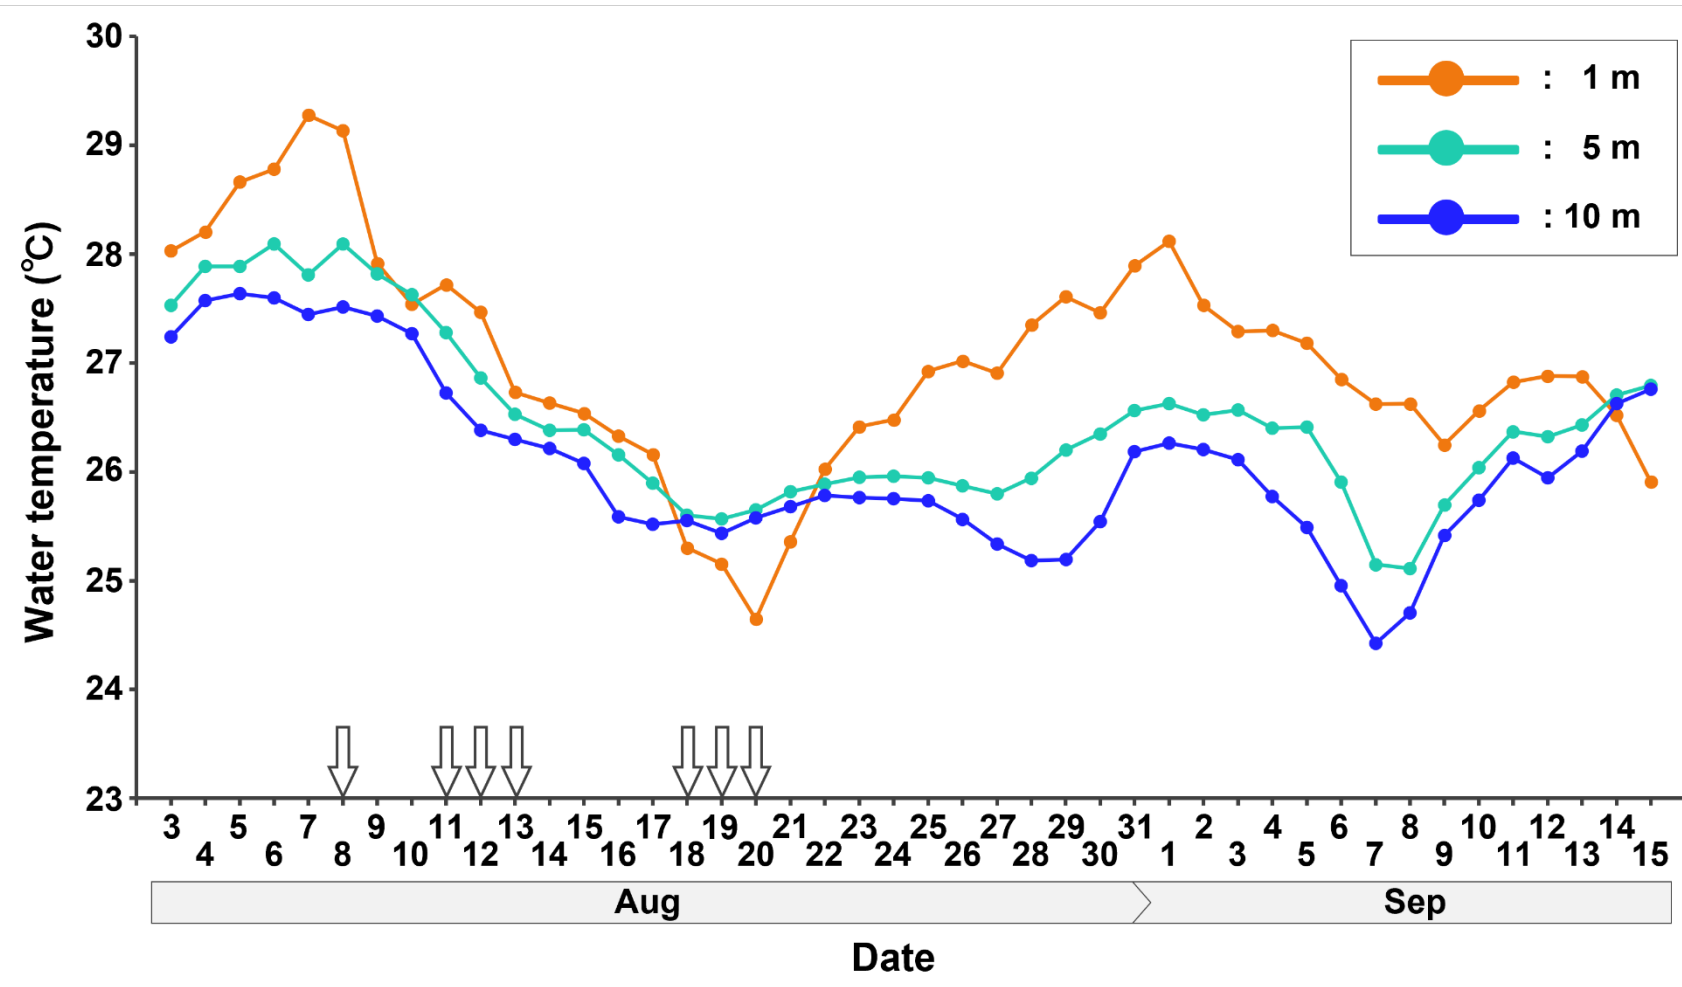

Figure S1. Water temperature at the depth of 1 m, 5 m, and 10 m in the experiment period from 3 August 2021 to 15 September 2021 at the rearing site [30]. White arrows indicate the days which recorded more than 40 mm of precipitation.

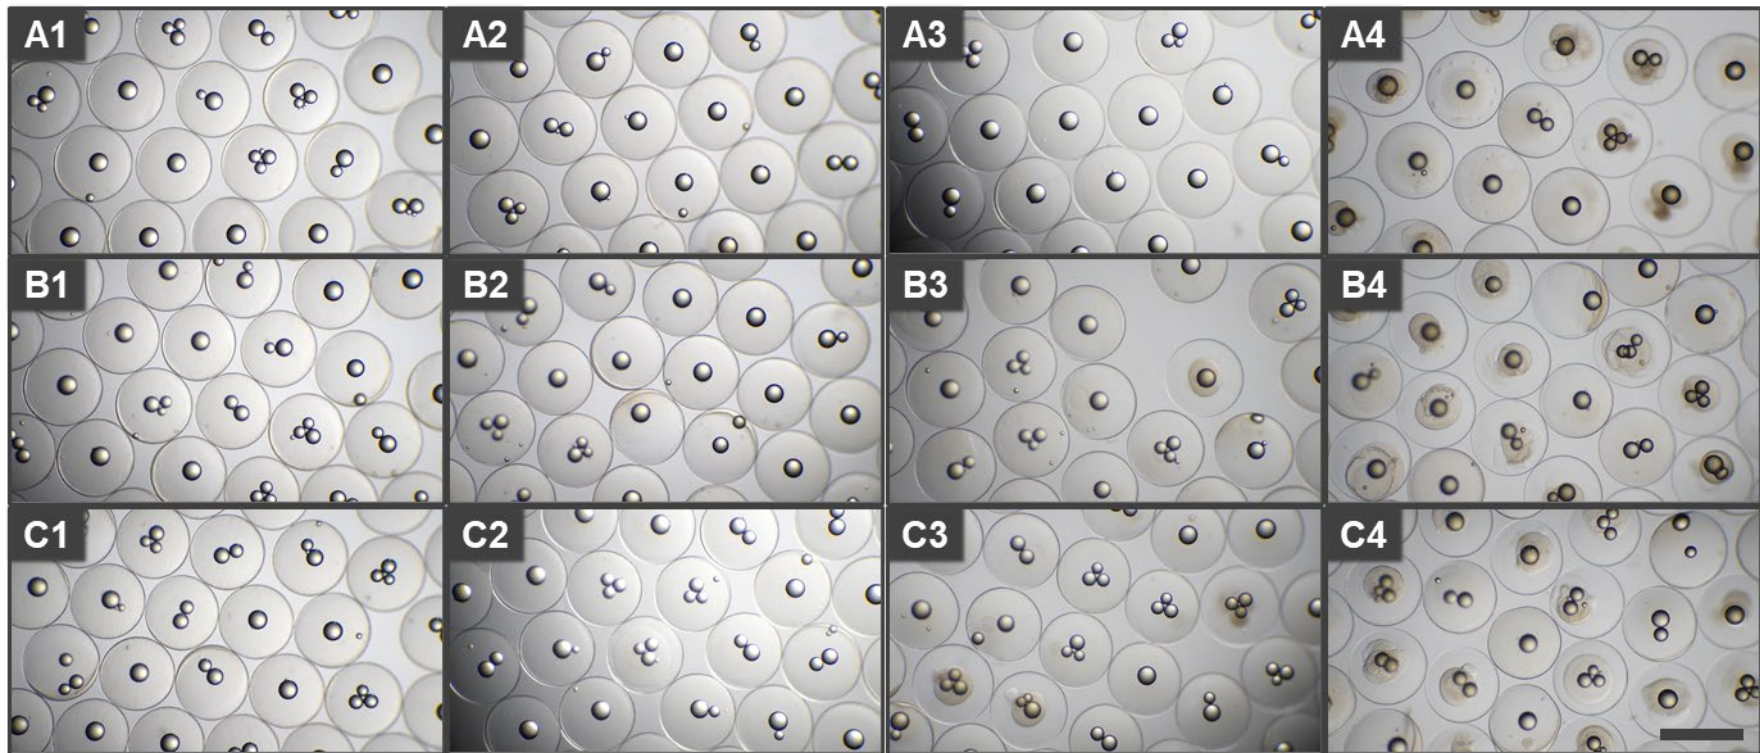

Figure S2. Ovulated eggs of kawakawa *Euthynnus affinis* after preservation in different solutions.

(A) Preservation in the Hanks' solution, (B) in the L-15 medium, and (C) in the Ringer's solution for marine teleost. Column 1: 1 h preservation, Column 2: 3 h preservation, Column 3: 5 h preservation, Column 4: 12 h preservation. Scale bar denotes 1 mm.
